# Supplementary material
Source: PubMed Central journal article supplement (PMC4148797)
Supplement: AEM.00720-14_zam999105517so1.pdf [file AEM.00720-14_zam999105517so1.pdf]

**Supplemental Table 1:** General characteristics of bacteriophages included in orthocluster analysis

| Phage           | Host                  | Accession no. | Genome Size (bp) | Family (morphotype)        | References |
|-----------------|-----------------------|---------------|------------------|----------------------------|------------|
| 42e             | <i>Staphylococcus</i> | AY954955.1    | 45861            | Siphoviridae (B1)          | 1          |
| 187             | <i>Staphylococcus</i> | AY954950.1    | 39620            | Siphoviridae (B2)          | 1          |
| A006            | <i>Listeria</i>       | NC_009815.1   | 38124            | Siphoviridae (B1)          | 2, 3       |
| A9              | <i>Brochothrix</i>    | NC_015253.1   | 127065           | Myoviridae                 | 4, 5       |
| A118            | <i>Listeria</i>       | NC_003216.1   | 40834            | Siphoviridae (B1)          | 2, 3, 6    |
| A500            | <i>Listeria</i>       | NC_009810.1   | 38867            | Siphoviridae (B1)          | 2, 3       |
| A511            | <i>Listeria</i>       | NC_009811.2   | 137619           | Myoviridae                 | 4, 7, 8    |
| B025            | <i>Listeria</i>       | NC_009812.1   | 42653            | Siphoviridae               | 2, 3       |
| B054            | <i>Listeria</i>       | NC_009813.1   | 48172            | Myoviridae                 | 2, 3       |
| BC-611          | <i>Enterococcus</i>   | NC_018086.1   | 53996            | Siphoviridae               | 9          |
| CaseusJM1       | <i>Lactococcus</i>    | KC522412.1    | 30692            | Siphoviridae (B1)          | 10         |
| Dp-1            | <i>Streptococcus</i>  | NC_015274.1   | 56506            | Siphoviridae               | 11         |
| EW              | <i>Staphylococcus</i> | AY954959.1    | 45286            | Siphoviridae <sup>ab</sup> | 1          |
| G               | <i>Bacillus</i>       | JN638751.1    | 497513           | Myoviridae                 | 37         |
| G1              | <i>Staphylococcus</i> | NC_007066.1   | 138715           | Myoviridae                 | 1          |
| K               | <i>Staphylococcus</i> | NC_005880.1   | 127395           | Myoviridae                 | 12         |
| Lb338-1         | <i>Lactobacillus</i>  | NC_012530.1   | 142111           | Myoviridae                 | 5, 13      |
| LP65            | <i>Lactobacillus</i>  | AY682195.1    | 131522           | Myoviridae                 | 5, 14      |
| M102            | <i>Streptococcus</i>  | NC_012884.1   | 31147            | Siphoviridae (B1)          | 15         |
| P35             | <i>Listeria</i>       | NC_009814.1   | 35822            | Siphoviridae (B1)          | 3          |
| P40             | <i>Listeria</i>       | NC_011308.1   | 35638            | Siphoviridae (B1)          | 3          |
| P70             | <i>Listeria</i>       | NC_018831.1   | 67170            | Siphoviridae (B3)          | 16         |
| P100            | <i>Listeria</i>       | DQ004855.1    | 131384           | Myoviridae                 | 5, 17      |
| Φ29             | <i>Bacillus</i>       | NC_011048.1   | 19282            | Podoviridae (C2)           | 18, 19     |
| Φ3626           | <i>Clostridium</i>    | NC_003524.1   | 33507            | Siphoviridae (B1)          | 20         |
| ΦAQ113          | <i>Lactobacillus</i>  | NC_019782.1   | 36566            | Myoviridae (A1)            | 21         |
| ΦCP24R          | <i>Clostridium</i>    | NC_019523.1   | 18919            | Podoviridae (C1)           | 22         |
| ΦCpV1           | <i>Clostridium</i>    | HM640230.1    | 16748            | Podoviridae (C1)           | 23         |
| phiD12          | <i>Streptococcus</i>  | KC581799.1    | 50470            | Unclassified               | 24         |
| ΦEf11           | <i>Enterococcus</i>   | NC_013696.1   | 42822            | Siphoviridae (B1)          | 25, 26     |
| ΦEF24C          | <i>Enterococcus</i>   | AP009390.1    | 142072           | Myoviridae                 | 4, 5, 27   |
| ΦNJ2            | <i>Streptococcus</i>  | NC_019418.1   | 37282            | Siphoviridae <sup>a</sup>  | 24, 28     |
| P68             | <i>Staphylococcus</i> | NC_004679.1   | 18227            | Podoviridae (C1)           | 29         |
| ΦPYB5           | <i>Lactobacillus</i>  | GU323708.1    | 32847            | Siphoviridae (B1)          | 30, 31     |
| PSA             | <i>Listeria</i>       | NC_003291.2   | 37618            | Siphoviridae (B1)          | 3, 32      |
| vB_SauM_Romulus | <i>Staphylococcus</i> | NC_020877.1   | 131332           | Myoviridae                 | 33         |
| SAP6            | <i>Enterococcus</i>   | JF731128.1    | 58619            | Siphoviridae               | 34         |
| SPO1            | <i>Bacillus</i>       | FJ230960.1    | 132562           | Myoviridae                 | 5, 35      |
| SPP1            | <i>Bacillus</i>       | X97918.2      | 44010            | Siphoviridae               | 36         |
| Twort           | <i>Staphylococcus</i> | NC_007021.1   | 130706           | Myoviridae                 | 1, 5       |

<sup>a</sup>Morphology as reported on NCBI. <sup>b</sup>Reference described phage as morphotype “A”; however, no micrograph or record of how this was determined could be found.

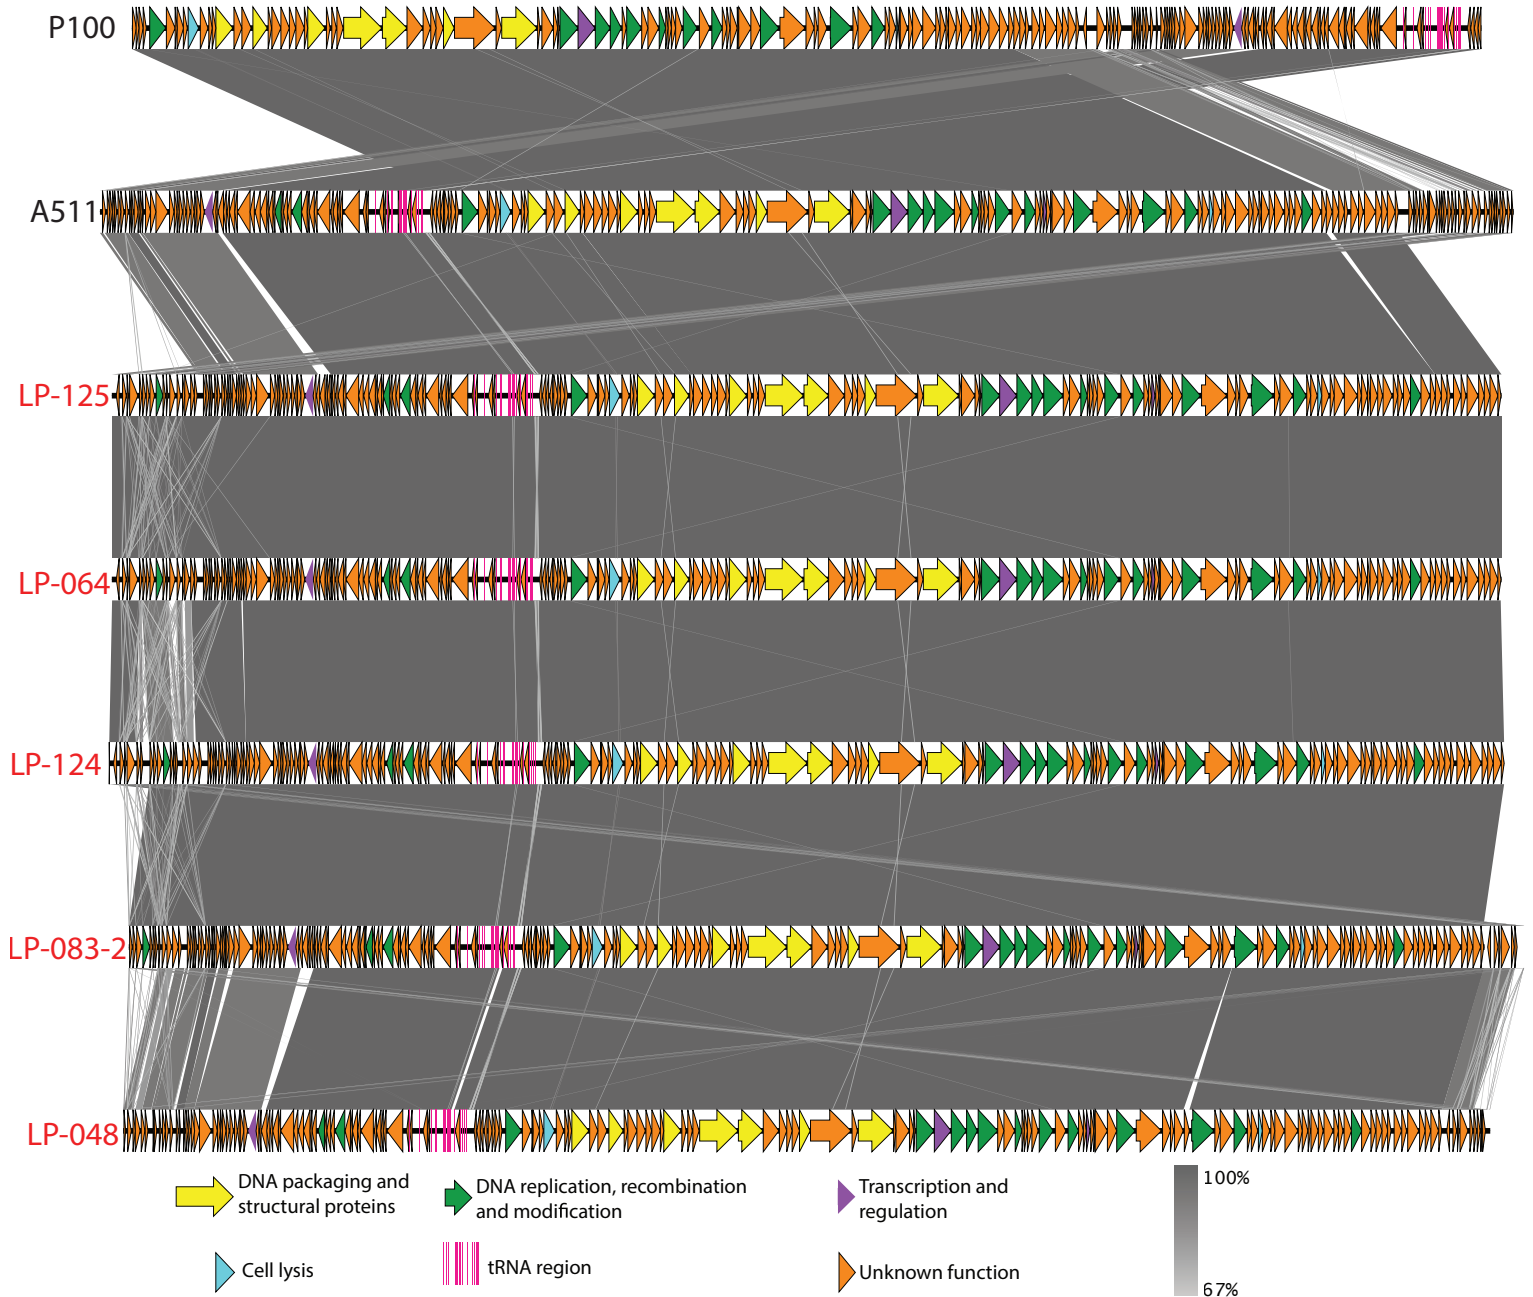

**Supplemental Figure 1.** Linear BLAST comparisons of orthocluster I *Listeria* phages. Predicted genes are indicated by arrows and are color coded by putative function. For LP-124, the original contig was reordered to move the terminal repeat sequences to the 5' end and to assure a 5' start for the genome comparison that is consistent with LP-064 (this required one single break of the original LP-124 contig; the GenBank accession for LP-124 represents the original, not re-ordered contig). The shade of gray drawn between genomes represents the level of nucleotide similarity (indicated on bottom right, darker is more similar). Phages in red text were sequenced in this study.

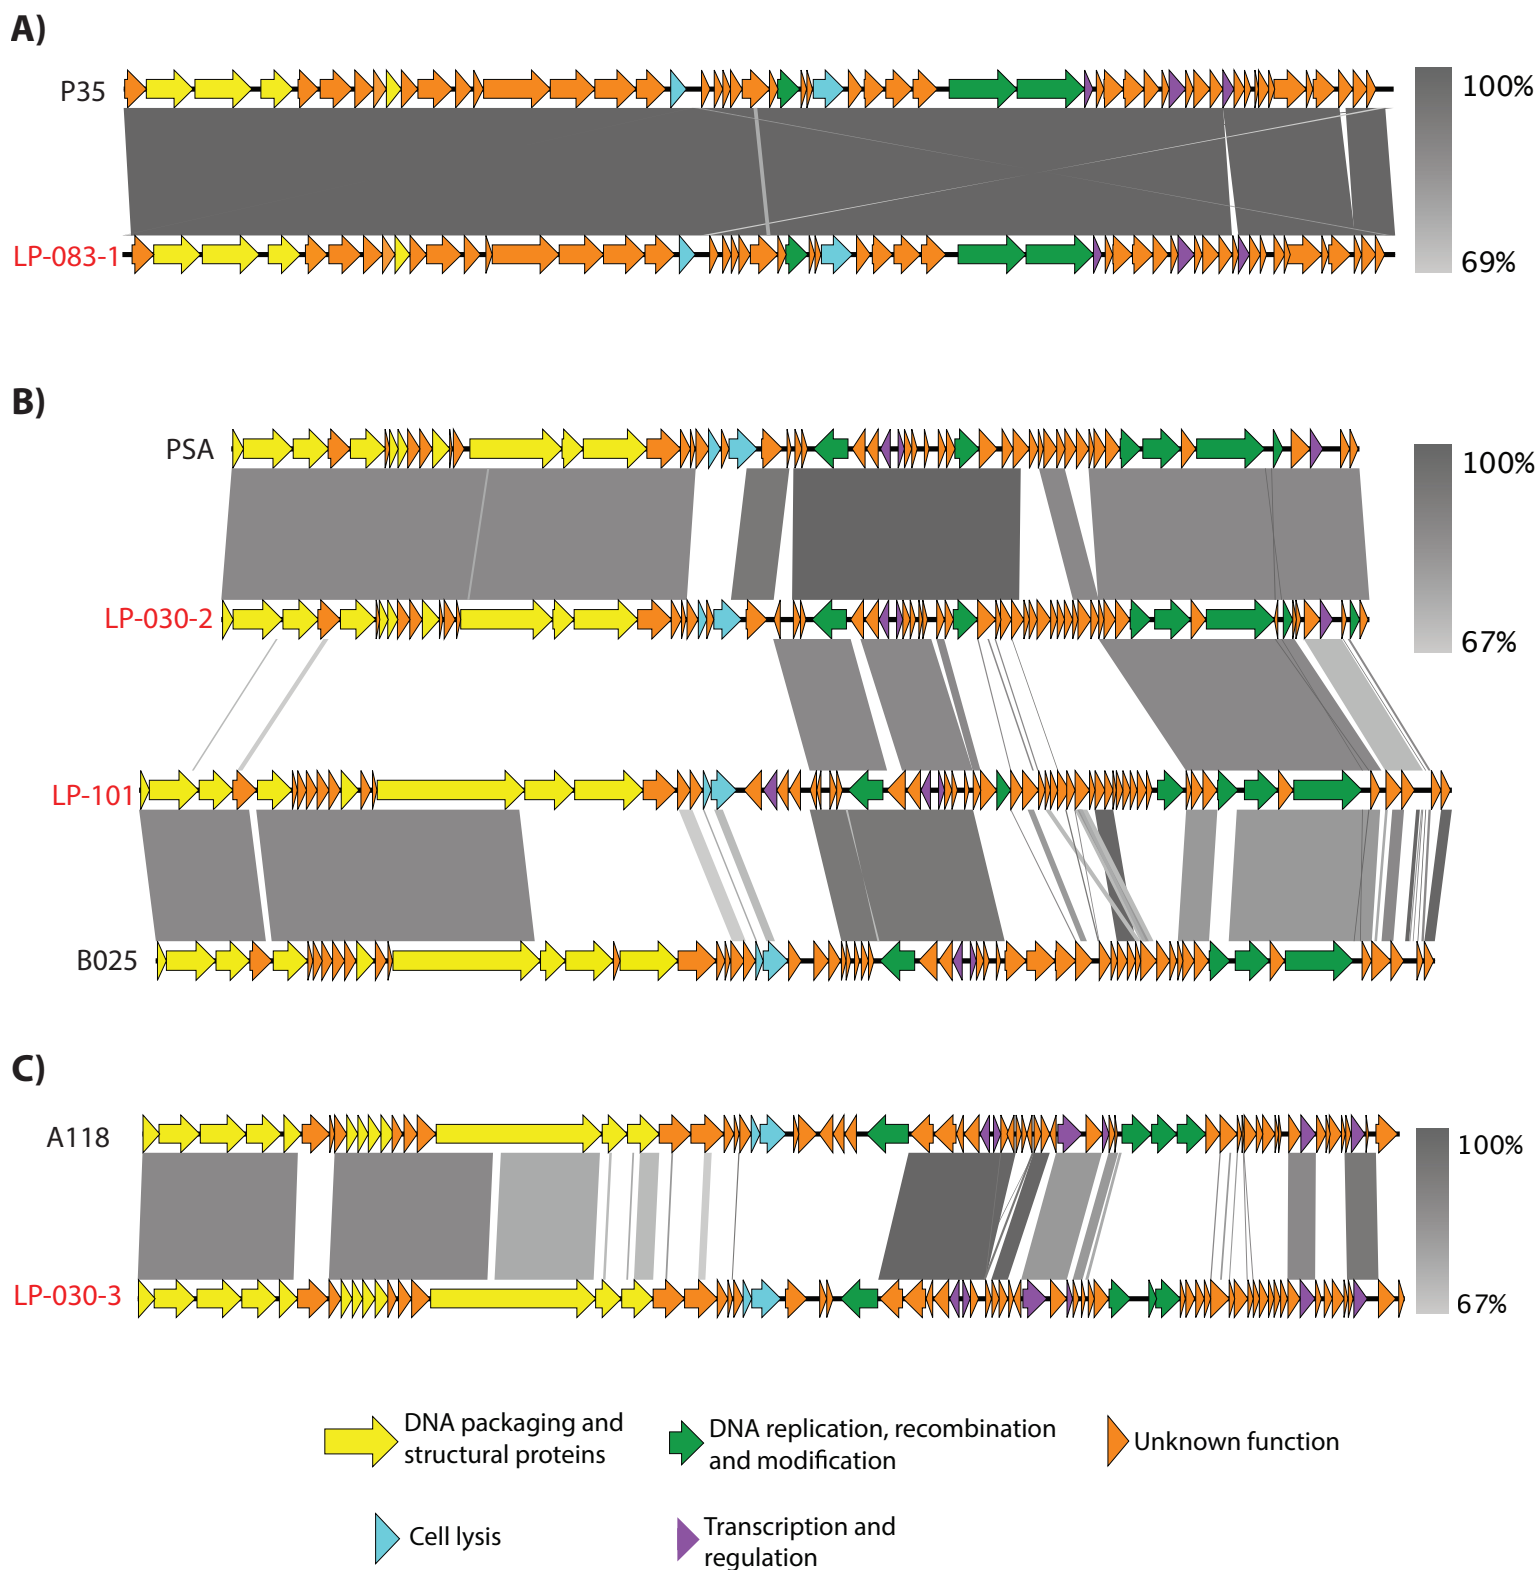

**Supplemental Figure 2.** Linear BLAST comparisons of orthocluster (A) II, (B) III, and (C) IV *Listeria* phages. Predicted genes are indicated by arrows and are color coded according to putative function. The shade of gray drawn between genomes represents the level of nucleotide similarity (indicated on right-hand side, darker is more similar). Phages in red text were sequenced in this study.

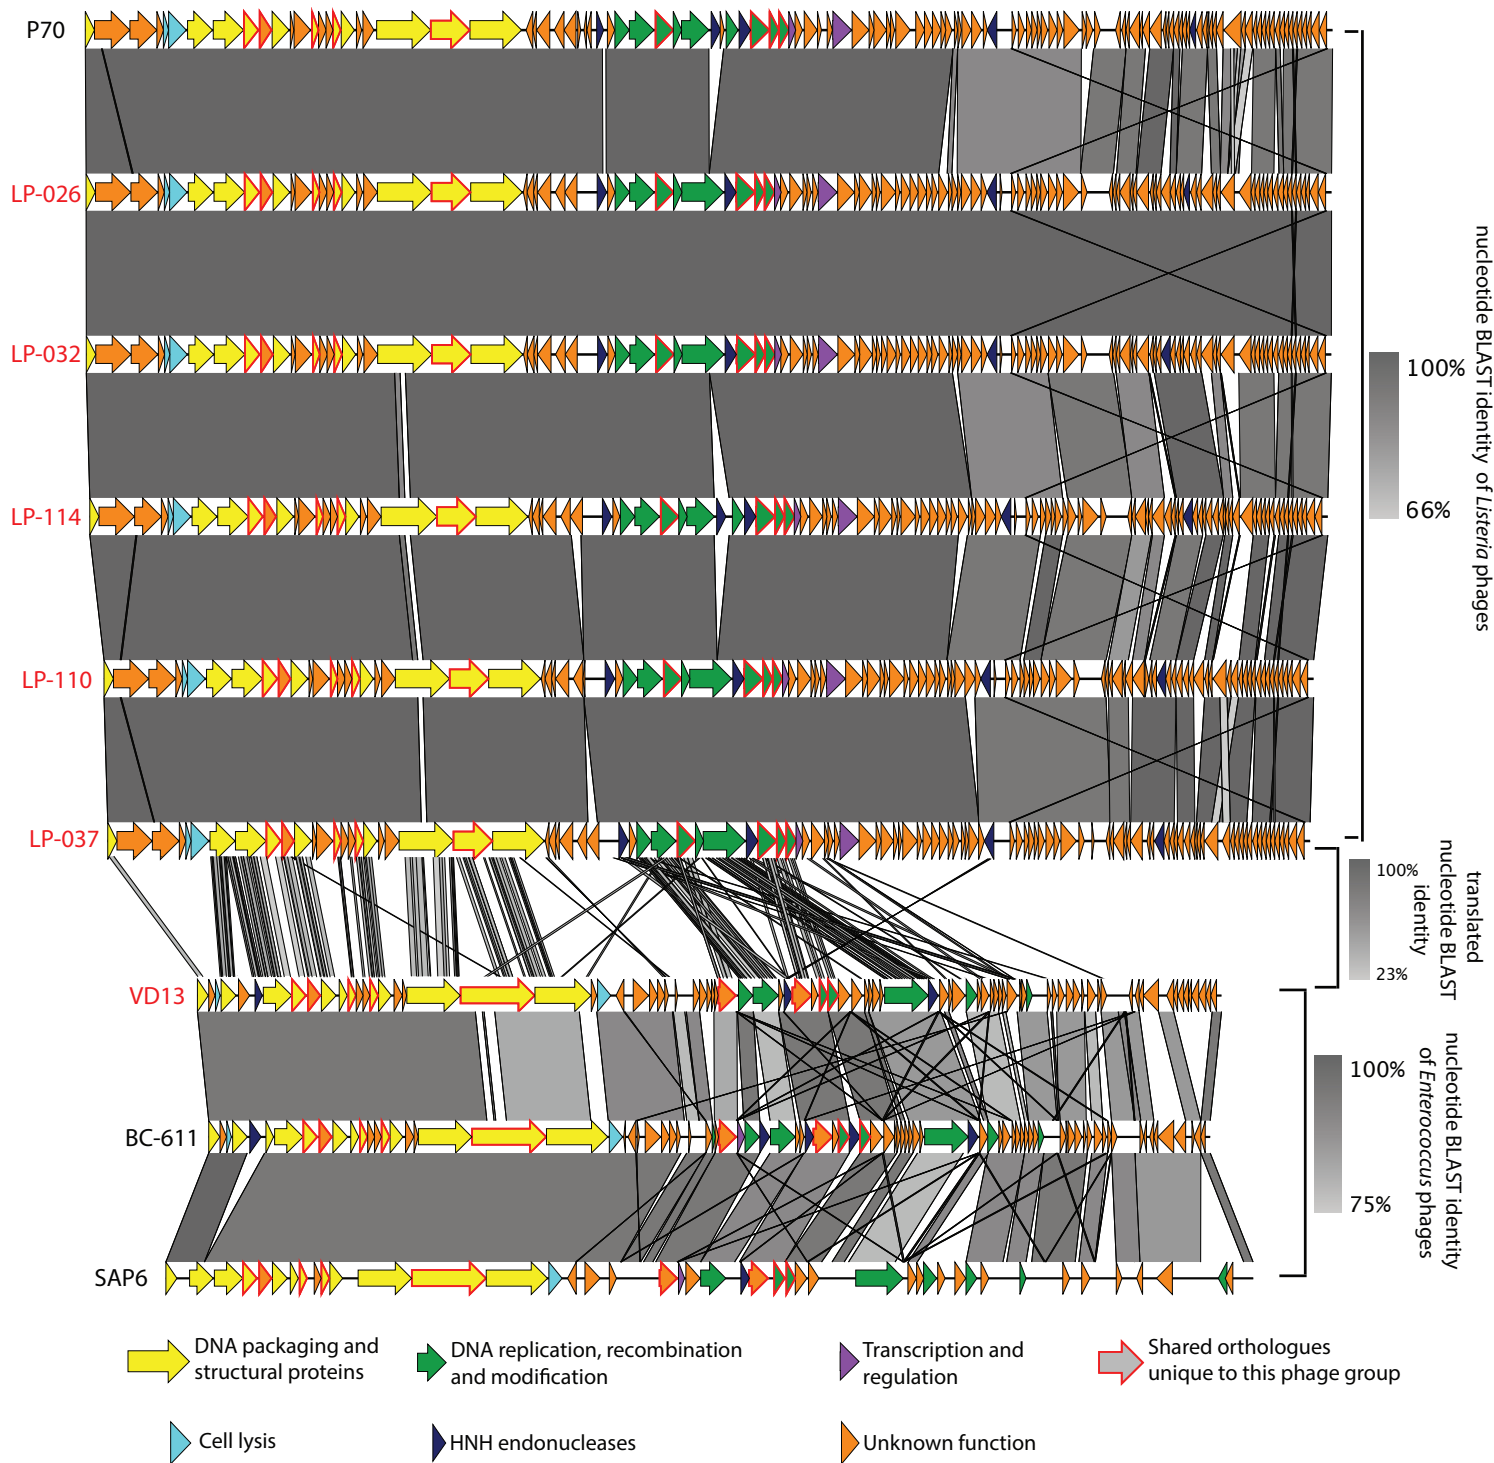

**Supplemental Figure 3.** Linear BLAST comparison of orthocluster V (LP-026, LP-032, LP-037, LP-110, and LP-114) and VI (VD13, SAP6, and BC-611) phages. Phages within orthoclusters are compared by average nucleotide identity. LP-037 and VD13 are compared by translated nucleotide identity. Predicted genes are indicated by arrows and are color coded by putative function. Bacteriophage genomes were reordered to start with the small terminase subunit. The shade of gray drawn between genomes represents the level of nucleotide or amino acid similarity (indicated on right-hand side, darker is more similar). Phages in red text were sequenced in this study.

## SUPPLEMENTAL REFERENCES

1. **Kwan T, Liu J, DuBow M, Gros P, Pelletier J.** 2005. The complete genomes and proteomes of 27 *Staphylococcus aureus* bacteriophages. Proc. Natl. Acad. Sci. U.S.A. **102**:5174–5179.
2. **Zink R, Loessner MJ.** 1992. Classification of virulent and temperate bacteriophages of *Listeria* spp. on the basis of morphology and protein analysis. Appl. Environ. Microbiol. **58**:296–302.
3. **Dorscht J, Klumpp J, Bielmann R, Schmelcher M, Born Y, Zimmer M, Calendar R, Loessner MJ.** 2009. Comparative genome analysis of *Listeria* bacteriophages reveals extensive mosaicism, programmed translational frameshifting, and a novel prophage insertion site. J. Bacteriol. **191**:7206–7215.
4. **Kilcher S, Loessner MJ, Klumpp J.** 2010. *Brochothrix thermosphacta* Bacteriophages Feature Heterogeneous and Highly Mosaic Genomes and Utilize Unique Prophage Insertion Sites. J. of Bacteriol. **192**:5441–5453.
5. **Klumpp J, Lavigne R, Loessner MJ, Ackermann H-W.** 2010. The SPO1-related bacteriophages. Arch. Virol. **155**:1547–1561.
6. **Loessner MJ, Inman RB, Lauer P, Calendar R.** 2000. Complete nucleotide sequence, molecular analysis and genome structure of bacteriophage A118 of *Listeria monocytogenes*: implications for phage evolution. Mol. Microbiol. **35**:324–340.
7. **Loessner MJ, Scherer S.** 1995. Organization and transcriptional analysis of the *Listeria* phage A511 late gene region comprising the major capsid and tail sheath protein genes cps and tsh. J. Bacteriol. **177**:6601–6609.

8. **Klumpp J, Dorscht J, Lurz R, Biemann R, Wieland M, Zimmer M, Calendar R, Loessner MJ.** 2008. The terminally redundant, nonpermuted genome of *Listeria* bacteriophage A511: a model for the SPO1-like myoviruses of gram-positive bacteria. *J. Bacteriol.* **190**:5753–5765.
9. **Horiuchi T, Sakka M, Hayashi A, Shimada T, Kimura T, Sakka K.** 2012. Complete Genome Sequence of Bacteriophage BC-611 Specifically Infecting *Enterococcus faecalis* Strain NP-10011. *J. Virol.* **86**:9538–9539.
10. **Murphy J, Mahony J, van Sinderen D.** 2013. Complete genome sequence of the 936-type lactococcal bacteriophage CaseusJM1. *Genome Announcements* 1.
11. **Sabri M, Häuser R, Ouellette M, Liu J, Dehbi M, Moeck G, García E, Titz B, Uetz P, Moineau S.** 2011. Genome annotation and intraviral interactome for the *Streptococcus pneumoniae* virulent phage Dp-1. *J. Bacteriol.* **193**:551–562.
12. **O'Flaherty S, Coffey A, Edwards R, Meaney W, Fitzgerald GF, Ross RP.** 2004. Genome of Staphylococcal Phage K: a New Lineage of Myoviridae Infecting Gram-Positive Bacteria with a Low G+C Content. *J. Bacteriol.* **186**:2862–2871.
13. **Alemayehu D, Ross RP, O'Sullivan O, Coffey A, Stanton C, Fitzgerald GF, McAuliffe O.** 2009. Genome of a virulent bacteriophage Lb338-1 that lyses the probiotic *Lactobacillus paracasei* cheese strain. *Gene* **448**:29–39.
14. **Chibani-Chennoufi S, Dillmann ML, Marvin-Guy L, Rami-Shojaei S, Brussow H.** 2004. *Lactobacillus plantarum* Bacteriophage LP65: a New Member of the SPO1-Like Genus of the Family Myoviridae. *J. Bacteriol.* **186**:7069–7083.
15. **van der Ploeg JR.** 2007. Genome sequence of *Streptococcus mutans* bacteriophage M102. *FEMS Microbiol. Lett.* **275**:130–138.

16. **Schmuki MM, Erne D, Loessner MJ, Klumpp J.** 2012. Bacteriophage P70: Unique Morphology and Unrelatedness to Other *Listeria* Bacteriophages. *J. Virol.* **86**:13099–13102.
17. **Carlton RM, Noordman WH, Biswas B, de Meester ED, Loessner MJ.** 2005. Bacteriophage P100 for control of *Listeria monocytogenes* in foods: genome sequence, bioinformatic analyses, oral toxicity study, and application. *Regul. Toxicol. Pharmacol.* **43**:301–312.
18. **Anderson DL, Hickman DD, Reilly BE.** 1966. Structure of *Bacillus subtilis* bacteriophage  $\phi$ 29 and the length of  $\phi$ 29 deoxyribonucleic acid. *Journal of Bacteriology* **91**:2081–2089.
19. **Pecenková T, Paces V.** 1999. Molecular phylogeny of phi29-like phages and their evolutionary relatedness to other protein-primed replicating phages and other phages hosted by gram-positive bacteria. *J. Mol. Evol.* **48**:197–208.
20. **Zimmer M, Scherer S, Loessner MJ.** 2002. Genomic analysis of *Clostridium perfringens* bacteriophage  $\phi$ 3626, which integrates into *guaA* and possibly affects sporulation. *J. Bacteriol.* **184**:4359–4368.
21. **Zago M, Scaltriti E, Rossetti L, Guffanti A, Armiento A, Fornasari ME, Grolli S, Carminati D, Brini E, Pavan P, Felsani A, D'Urzo A, Moles A, Claude JB, Grandori R, Ramoni R, Giraffa G.** 2013. Characterization of the Genome of the Dairy *Lactobacillus helveticus* Bacteriophage  $\Phi$ AQ113. *Appl. Environ. Microbiol.* **79**:4712–4718.

22. **Morales CA, Oakley BB, Garrish JK, Siragusa GR, Ard MB, Seal BS.** 2012. Complete genome sequence of the podoviral bacteriophage  $\Phi$ CP24R, which is virulent for *Clostridium perfringens*. *Arch. Virol.* **157**:769–772.
23. **Oakley BB, Talundzic E, Morales CA, Hiatt KL, Siragusa GR, Volozhantsev NV, Seal BS.** 2011. Comparative genomics of four closely related *Clostridium perfringens* bacteriophages reveals variable evolution among core genes with therapeutic potential. *BMC Genomics* **12**:282.
24. **Tang F, Bossers A, Harders F, Lu C, Smith H.** 2013. Comparative genomic analysis of twelve *Streptococcus suis* (pro)phages. *Genomics* **101**:336–344.
25. **Stevens RH, Porras OD, Delisle AL.** 2009. Bacteriophages induced from lysogenic root canal isolates of *Enterococcus faecalis*. *Oral Microbiol. Immunol.* **24**:278–284.
26. **Stevens RH, Ektefaie MR, Fouts DE.** 2011. The annotated complete DNA sequence of *Enterococcus faecalis* bacteriophage  $\phi$ Ef11 and its comparison with all available phage and predicted prophage genomes. *FEMS Microbiol. Lett.* **317**:9–26.
27. **Uchiyama J, Rashel M, Takemura I, Wakiguchi H, Matsuzaki S.** 2008. In silico and in vivo evaluation of bacteriophage  $\Phi$ EF24C, a candidate for treatment of *Enterococcus faecalis* infections. *Appl. Environ. Microbiol.* **74**:4149–4163.
28. **Tang F, Bossers A, Harders F, Lu C, Smith H.** 2013. Complete Genome Sequence of the *Streptococcus suis* Temperate Bacteriophage  $\Phi$ NJ2. *Genome Announcements* **1**:e00008–12. doi:10.1128/genomeA.00008-12.
29. **Vybiral D, Takáč M, Loessner M, Witte A, Ahsen U, Bläsi U.** 2003. Complete nucleotide sequence and molecular characterization of two lytic *Staphylococcus aureus* phages: 44AHJD and P68. *FEMS Microbiol. Lett.* **219**:275–283.



30. **Zhang X, Kong J, Qu Y. 2006.** Isolation and characterization of a *Lactobacillus fermentum* temperate bacteriophage from Chinese yogurt. *J. Appl. Microbiol.* **101**:857–863.
31. **Zhang X, Wang S, Guo T, Kong J. 2011.** Genome analysis of *Lactobacillus fermentum* temperate bacteriophage  $\Phi$ PYB5. *Int. J. Food Microbiol.* **144**:400–405.
32. **Zimmer M, Sattelberger E, Inman RB, Calendar R, Loessner MJ. 2003.** Genome and proteome of *Listeria monocytogenes* phage PSA: an unusual case for programmed + 1 translational frameshifting in structural protein synthesis. *Mol. Microbiol.* **50**:303–317.
33. **Vandersteegen K, Kropinski AM, Nash JHE, Noben JP, Hermans K, Lavigne R. 2013.** Romulus and Remus, Two Phage Isolates Representing a Distinct Clade within the Twortlikevirus Genus, Display Suitable Properties for Phage Therapy Applications. *J. Virol.* **87**:3237–3247.
34. **Lee YD, Park JH. 2012.** Complete Genome Sequence of Enterococcal Bacteriophage SAP6. *J. Virol.* **86**:5402–5403.
35. **Stewart CR, Casjens SR, Cresawn SG, Houtz JM, Smith AL, Ford ME, Peebles CL, Hatfull GF, Hendrix RW, Huang WM, Pedulla ML. 2009.** The Genome of *Bacillus subtilis* Bacteriophage SPO1. *J. Mol. Biol.* **388**:48–70.
36. **Alonso JC, Luder G, Stiege AC, Chai S, Weise F, Trautner TA. 1997.** The complete nucleotide sequence and functional organization of *Bacillus subtilis* bacteriophage SPP11. *Gene* **204**:201–212.

37. **Donelli G, Guglielmi F, Paoletti L.** 1972. Structure and physico-chemical properties of bacteriophage G. I. Arrangement of protein subunits and contraction process of tail sheath. *J. Mol. Biol.* **71**:113–125.
